# Supplementary material for: Applications of node-based resilience graph theoretic framework to clustering autism spectrum disorders phenotypes
Source: Appl Netw Sci. 2018 Aug 29;3(1):38. doi: 10.1007/s41109-018-0093-0 (PMC6214326; doi:10.1007/s41109-018-0093-0)
Supplement: Supplementary file 1 — Cohen-d test values for Tables 6 and 7 to evaluate the effect sizes for each pairwise comparison. (XLSX 32 kb) [file 41109_2018_93_MOESM1_ESM.xlsx]

## Sheet: knn2 VAT-4 cluster result
	knn2 VAT 4-cluster result
Dependent Variable	Cluster	compared to Cluster	Cohen effect size
ABC Overall Score	0	1	0.364
		2	0.37
		3	0.203
	1	0	0.364
		2	0.733
		3	0.567
	2	0	0.37
		1	0.733
		3	0.166
	3	0	0.203
		1	0.567
		2	0.166
RBS R Overall Score	0	1	0.034
		2	0.461
		3	0.391
	1	0	0.034
		2	0.495
		3	0.425
	2	0	0.461
		1	0.495
		3	0.07
	3	0	0.391
		1	0.425
		2	0.07
ADOS CSS	0	1	0.121
		2	0.146
		3	0.13
	1	0	0.121
		2	0.266
		3	0.01
	2	0	0.146
		1	0.266
		3	0.276
	3	0	0.13
		1	0.01
		2	0.276
Vineland Composite Score	0	1	1.384
		2	0.506
		3	0.203
	1	0	1.384
		2	1.889
		3	1.181
	2	0	0.506
		1	1.889
		3	0.708
	3	0	0.203
		1	1.181
		2	0.708
Overall IQ	0	1	1.77
		2	0.643
		3	0.478
	1	0	1.77
		2	2.412
		3	1.292
	2	0	0.643
		1	2.412
		3	1.12
	3	0	0.478
		1	1.292
		2	1.12
PPVTA 4A	0	1	1.694
		2	0.634
		3	0.479
	1	0	1.694
		2	2.328
		3	1.216
	2	0	0.634
		1	2.328
		3	1.112
	3	0	0.479
		1	1.216
		2	1.112

## Sheet:  knn2 Tenacity 5-cluster result
	knn2 Tenacity 5-cluster result
Dependent Variable	Cluster	compared to Cluster	Cohen effect size
ABC Overall Score	0	1	1.389
		2	1.516
		3	1.049
		4	0.27
	1	0	1.389
		2	0.127
		3	0.34
		4	1.12
	2	0	1.516
		1	0.127
		3	0.467
		4	1.246
	3	0	1.049
		1	0.34
		2	0.467
		4	0.779
	4	0	0.27
		1	1.12
		2	1.246
		3	0.779
RBS R Overall Score	0	1	1.302
		2	1.551
		3	1.087
		4	0.526
	1	0	1.302
		2	0.249
		3	0.215
		4	0.776
	2	0	1.551
		1	0.249
		3	0.464
		4	1.025
	3	0	1.087
		1	0.215
		2	0.464
		4	0.561
	4	0	0.526
		1	0.776
		2	1.025
		3	0.561
ADOS CSS	0	1	0.063
		2	0.044
		3	0.167
		4	0.402
	1	0	0.063
		2	0.108
		3	0.104
		4	0.339
	2	0	0.044
		1	0.108
		3	0.212
		4	0.447
	3	0	0.167
		1	0.104
		2	0.212
		4	0.235
	4	0	0.402
		1	0.339
		2	0.447
		3	0.235
Vineland Composite Score	0	1	0.081
		2	0.494
		3	0.056
		4	1.452
	1	0	0.081
		2	0.413
		3	0.025
		4	1.533
	2	0	0.494
		1	0.413
		3	0.438
		4	1.946
	3	0	0.056
		1	0.025
		2	0.438
		4	1.508
	4	0	1.452
		1	1.533
		2	1.946
		3	1.508
Overall IQ	0	1	0.486
		2	0.069
		3	0.546
		4	2.216
	1	0	0.486
		2	0.555
		3	0.06
		4	1.73
	2	0	0.069
		1	0.555
		3	0.615
		4	2.285
	3	0	0.546
		1	0.06
		2	0.615
		4	1.67
	4	0	2.216
		1	1.73
		2	2.285
		3	1.67
PPVTA 4A	0	1	0.592
		2	0.005
		3	0.657
		4	2.199
	1	0	0.592
		2	0.597
		3	0.065
		4	1.607
	2	0	0.005
		1	0.597
		3	0.663
		4	2.205
	3	0	0.657
		1	0.065
		2	0.663
		4	1.542
	4	0	2.199
		1	1.607
		2	2.205
		3	1.542

## Sheet: knn2 Integrity 3-cluster result
	knn2 Integrity 3-cluster result
Dependent Variable	Cluster	compared to Cluster	Cohen effect size
ABC Overall Score	0	1	0.325
		2	0.071
	1	0	0.325
		2	0.254
	2	0	0.071
		1	0.254
RBS R Overall Score	0	1	0.097
		2	0.06
	1	0	0.097
		2	0.157
	2	0	0.06
		1	0.157
ADOS CSS	0	1	0.126
		2	0.153
	1	0	0.126
		2	0.027
	2	0	0.153
		1	0.027
Vineland Composite Score	0	1	1.624
		2	0.46
	1	0	1.624
		2	1.164
	2	0	0.46
		1	1.164
Overall IQ	0	1	2.04
		2	0.753
	1	0	2.04
		2	1.287
	2	0	0.753
		1	1.287
PPVTA 4A	0	1	1.948
		2	0.748
	1	0	1.948
		2	1.2
	2	0	0.748
		1	1.2

## Sheet:  knn3 Tenacity 5cluster_0.8
	knn3 Tenacity 5-cluster result
Dependent Variable	Cluster	compared to Cluster	Cohen effect size
ABC Overall Score	0	1	0.405
		2	1.43
		3	0.878
		4	1.037
	1	0	0.405
		2	1.025
		3	0.473
		4	0.632
	2	0	1.43
		1	1.025
		3	0.552
		4	0.394
	3	0	0.878
		1	0.473
		2	0.552
		4	0.159
	4	0	1.037
		1	0.632
		2	0.394
		3	0.159
RBS R Overall Score	0	1	0.759
		2	1.566
		3	0.83
		4	1.123
	1	0	0.759
		2	0.807
		3	0.07
		4	0.363
	2	0	1.566
		1	0.807
		3	0.737
		4	0.444
	3	0	0.83
		1	0.07
		2	0.737
		4	0.293
	4	0	1.123
		1	0.363
		2	0.444
		3	0.293
ADOS CSS	0	1	0.091
		2	0.216
		3	0.007
		4	0.069
	1	0	0.091
		2	0.125
		3	0.085
		4	0.16
	2	0	0.216
		1	0.125
		3	0.209
		4	0.285
	3	0	0.007
		1	0.085
		2	0.209
		4	0.076
	4	0	0.069
		1	0.16
		2	0.285
		3	0.076
Vineland Composite Score	0	1	1.515
		2	0.629
		3	0.07
		4	0.035
	1	0	1.515
		2	2.144
		3	1.445
		4	1.55
	2	0	0.629
		1	2.144
		3	0.699
		4	0.594
	3	0	0.07
		1	1.445
		2	0.699
		4	0.105
	4	0	0.035
		1	1.55
		2	0.594
		3	0.105
Overall IQ	0	1	2.268
		2	0.37
		3	0.413
		4	0.466
	1	0	2.268
		2	2.638
		3	1.855
		4	1.802
	2	0	0.37
		1	2.638
		3	0.783
		4	0.836
	3	0	0.413
		1	1.855
		2	0.783
		4	0.053
	4	0	0.466
		1	1.802
		2	0.836
		3	0.053
PPVTA 4A	0	1	2.203
		2	0.289
		3	0.485
		4	0.567
	1	0	2.203
		2	2.492
		3	1.719
		4	1.637
	2	0	0.289
		1	2.492
		3	0.774
		4	0.856
	3	0	0.485
		1	1.719
		2	0.774
		4	0.082
	4	0	0.567
		1	1.637
		2	0.856
		3	0.082

## Sheet: knn2 Tenacity 5-clusterNR
	knn2 Tenacity 5-cluster result
Dependent Variable	Cluster	compared to Cluster	Cohen effect size
ABC Overall Score	0	1	0.233
		2	0.079
		3	0.849
		4	0.311
	1	0	0.233
		2	0.154
		3	1.083
		4	0.544
	2	0	0.079
		1	0.154
		3	0.928
		4	0.39
	3	0	0.849
		1	1.083
		2	0.928
		4	0.539
	4	0	0.311
		1	0.544
		2	0.39
		3	0.539
RBS R Overall Score	0	1	0.391
		2	0.223
		3	0.75
		4	0.029
	1	0	0.391
		2	0.169
		3	1.142
		4	0.363
	2	0	0.223
		1	0.169
		3	0.973
		4	0.194
	3	0	0.75
		1	1.142
		2	0.973
		4	0.779
	4	0	0.029
		1	0.363
		2	0.194
		3	0.779
ADOS CSS	0	1	0.229
		2	0.093
		3	0.668
		4	0.067
	1	0	0.229
		2	0.322
		3	0.897
		4	0.162
	2	0	0.093
		1	0.322
		3	0.576
		4	0.16
	3	0	0.668
		1	0.897
		2	0.576
		4	0.735
	4	0	0.067
		1	0.162
		2	0.16
		3	0.735
Vineland Composite Score	0	1	0.503
		2	0.168
		3	0.415
		4	1.585
	1	0	0.503
		2	0.671
		3	0.918
		4	2.088
	2	0	0.168
		1	0.671
		3	0.248
		4	1.417
	3	0	0.415
		1	0.918
		2	0.248
		4	1.17
	4	0	1.585
		1	2.088
		2	1.417
		3	1.17
Overall IQ	0	1	0.615
		2	0.446
		3	0.235
		4	1.935
	1	0	0.615
		2	1.061
		3	0.849
		4	2.55
	2	0	0.446
		1	1.061
		3	0.212
		4	1.489
	3	0	0.235
		1	0.849
		2	0.212
		4	1.701
	4	0	1.935
		1	2.55
		2	1.489
		3	1.701
PPVTA 4A	0	1	0.643
		2	0.435
		3	0.132
		4	1.874
	1	0	0.643
		2	1.078
		3	0.775
		4	2.517
	2	0	0.435
		1	1.078
		3	0.303
		4	1.439
	3	0	0.132
		1	0.775
		2	0.303
		4	1.742
	4	0	1.874
		1	2.517
		2	1.439
		3	1.742

## Sheet: knn2 Integrity 5-clusterNR
	knn2 Integrity 5-cluster result
Dependent Variable	Cluster	compared to Cluster	Cohen effect size
ABC Overall Score	0	1	1.165
		2	0.02
		3	0.37
		4	0.813
	1	0	1.165
		2	1.145
		3	1.535
		4	0.352
	2	0	0.02
		1	1.145
		3	0.39
		4	0.793
	3	0	0.37
		1	1.535
		2	0.39
		4	1.183
	4	0	0.813
		1	0.352
		2	0.793
		3	1.183
RBS R Overall Score	0	1	1.327
		2	0.072
		3	0.277
		4	0.478
	1	0	1.327
		2	1.255
		3	1.605
		4	0.849
	2	0	0.072
		1	1.255
		3	0.349
		4	0.407
	3	0	0.277
		1	1.605
		2	0.349
		4	0.756
	4	0	0.478
		1	0.849
		2	0.407
		3	0.756
ADOS CSS	0	1	0.254
		2	0.228
		3	0.165
		4	0.383
	1	0	0.254
		2	0.027
		3	0.089
		4	0.129
	2	0	0.228
		1	0.027
		3	0.062
		4	0.155
	3	0	0.165
		1	0.089
		2	0.062
		4	0.217
	4	0	0.383
		1	0.129
		2	0.155
		3	0.217
Vineland Composite Score	0	1	0.788
		2	0.434
		3	0.286
		4	1.915
	1	0	0.788
		2	0.354
		3	0.502
		4	1.127
	2	0	0.434
		1	0.354
		3	0.148
		4	1.482
	3	0	0.286
		1	0.502
		2	0.148
		4	1.63
	4	0	1.915
		1	1.127
		2	1.482
		3	1.63
Overall IQ	0	1	0.737
		2	0.748
		3	0.539
		4	2.485
	1	0	0.737
		2	0.011
		3	0.198
		4	1.747
	2	0	0.748
		1	0.011
		3	0.21
		4	1.736
	3	0	0.539
		1	0.198
		2	0.21
		4	1.946
	4	0	2.485
		1	1.747
		2	1.736
		3	1.946
PPVTA 4A	0	1	0.635
		2	0.791
		3	0.562
		4	2.313
	1	0	0.635
		2	0.156
		3	0.073
		4	1.677
	2	0	0.791
		1	0.156
		3	0.229
		4	1.522
	3	0	0.562
		1	0.073
		2	0.229
		4	1.751
	4	0	2.313
		1	1.677
		2	1.522
		3	1.751

## Sheet: knn2 VAT 2-clusterNR
	knn2 VAT 2-cluster result
Dependent Variable	Cluster	compared to Cluster	Cohen effect size
ABC Overall Score	47.0077	45.6601	0.052
RBS R Overall Score	27.7447	25.0119	0.156
ADOS CSS	7.37645	7.6917	0.186
Vineland Composite Score	73.9899	70.4684	0.287
Overall IQ	83.4985	69.0911	0.516
PPVTA 4A	87.5069	71.4639	0.556
